# Supplementary material for: Magnetospheric Multiscale observations of energetic oxygen ions at the duskside magnetopause during intense substorms
Source: Copernicus journal article supplement (doi:10.5194/angeo-38-123-2020), 2020-01-29
Supplement: Supplementary file 1 [file angeo-38-123-2020-supplement.pdf]

Supplement of Ann. Geophys., 38, 123–135, 2020  
<https://doi.org/10.5194/angeo-38-123-2020-supplement>  
© Author(s) 2020. This work is distributed under  
the Creative Commons Attribution 4.0 License.

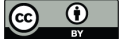

*Supplement of*

## **Magnetospheric Multiscale observations of energetic oxygen ions at the duskside magnetopause during intense substorms**

**Chen Zeng et al.**

*Correspondence to:* Chi Wang ([cw@spaceweather.ac.cn](mailto:cw@spaceweather.ac.cn)) and Suping Duan ([spduan@nssc.ac.cn](mailto:spduan@nssc.ac.cn))

The copyright of individual parts of the supplement might differ from the CC BY 4.0 License.

**Table S1.** Mean values of the  $O^+$  (1-40 keV),  $H^+$  (1 eV-40 keV) density, the  $O^+$ ,  $H^+$  particle fluxes for energies at ~1 keV, ~10 keV, ~20 keV and ~35 keV in the magnetopause boundary layer during intense substorm (AE>500nT). And the corresponding mean values of the MMS locations (Rx, Ry and Rz), three components of the interplanetary magnetic field (IMF Bx, By and Bz), solar wind dynamic pressure and AE index during magnetopause boundary layer crossings. The 0 and 1 indicate the events occurred during the expansion phase and recovery phase of intense substorm, respectively.

| Magnetopause boundary layer crossing time interval | $N_{O^+}$ ( $cm^{-3}$ )<br>(1-40keV) | $N_{H^+}$ ( $cm^{-3}$ )<br>(1eV-40keV) | $O^+$ Flux 1 keV | $H^+$ Flux 1 keV | $O^+$ Flux 10 keV | $H^+$ Flux 10 keV | $O^+$ Flux 20 keV | $H^+$ Flux 20 keV | $O^+$ Flux 35 keV | $H^+$ Flux 35 keV | Position ( $R_E$ ) |        |        | IMF (nT) |        |        | Psw (nPa) | AE (nT)   | Phase |
|----------------------------------------------------|--------------------------------------|----------------------------------------|------------------|------------------|-------------------|-------------------|-------------------|-------------------|-------------------|-------------------|--------------------|--------|--------|----------|--------|--------|-----------|-----------|-------|
|                                                    |                                      |                                        |                  |                  |                   |                   |                   |                   |                   |                   | Rx                 | Ry     | Rz     | Bx       | By     | Bz     |           |           |       |
| 2015-09-07/07:05-07:10                             | 0.142                                | 1.237                                  | 37.230           | 274.289          | 42.911            | 725.507           | 21.682            | 601.114           | 6.157             | 459.269           | 4.786              | 4.033  | -1.749 | -3.089   | 4.256  | -9.451 | 2.205     | 629.545   | 1     |
| 2015-09-07/17:55-18:05                             | 0.091                                | 11.613                                 | 35.929           | 29,934.206       | 15.230            | 586.124           | 12.633            | 230.363           | 4.931             | 149.602           | 1.574              | 10.879 | -4.372 | 1.612    | 3.605  | -8.888 | 3.528     | 941.545   | 1     |
| 2015-09-07/20:55-21:05                             | 0.046                                | 3.080                                  | 31.220           | 7,061.769        | 6.990             | 79.934            | 2.187             | 21.917            | 0.848             | 5.694             | -0.197             | 10.206 | -3.186 | -0.145   | 6.852  | -8.408 | 4.132     | 835.909   | 0     |
| 2015-09-09/08:35-08:45                             | 0.599                                | 14.406                                 | 179.469          | 42,735.070       | 76.019            | 496.719           | 29.063            | 251.542           | 6.214             | 149.610           | 5.276              | 5.971  | -3.318 | 1.373    | 1.760  | -7.910 | 3.937     | 606.364   | 1     |
| 2015-09-09/12:39-12:45                             | 0.107                                | 7.842                                  | 31.637           | 16,483.012       | 17.698            | 564.204           | 9.887             | 325.903           | 2.622             | 177.350           | 4.423              | 8.870  | -5.536 | -0.763   | -4.249 | -7.456 | 2.322     | 741.714   | 0     |
| 2015-09-09/13:15-13:25                             | 0.056                                | 14.047                                 | 37.296           | 21,678.069       | 10.373            | 400.182           | 9.180             | 261.400           | 2.946             | 128.748           | 4.174              | 9.219  | -5.621 | -1.215   | -3.233 | -7.225 | 1.959     | 637.091   | 1     |
| 2015-09-09/13:45-13:55                             | 0.064                                | 9.041                                  | 36.773           | 11,580.033       | 12.045            | 306.715           | 6.542             | 137.802           | 1.541             | 50.572            | 3.981              | 9.458  | -5.636 | -1.345   | -2.694 | -7.194 | 2.721     | 1,038.273 | 1     |
| 2015-09-09/14:25-14:35                             | 0.043                                | 10.241                                 | 38.495           | 18,815.151       | 8.119             | 375.745           | 4.932             | 222.822           | 1.523             | 124.868           | 3.661              | 9.802  | -5.586 | -1.339   | -1.984 | -6.619 | 3.493     | 1,139.000 | 0     |
| 2015-09-09/15:35-15:43                             | 0.059                                | 14.944                                 | 32.768           | 26,134.293       | 11.508            | 377.701           | 8.116             | 236.275           | 2.112             | 144.860           | 3.097              | 10.279 | -5.335 | -3.020   | 0.044  | -6.352 | 2.803     | 1,005.556 | 1     |
| 2015-09-09/18:40-18:50                             | 0.040                                | 5.551                                  | 29.022           | 12,149.427       | 8.418             | 553.067           | 4.270             | 240.704           | 1.273             | 87.097            | 1.367              | 10.756 | -4.066 | -2.744   | -1.611 | -6.038 | 3.342     | 856.545   | 0     |
| 2015-09-10/19:10-19:20                             | 0.046                                | 20.640                                 | 37.101           | 22,002.970       | 7.806             | 378.786           | 3.024             | 309.229           | 0.979             | 230.639           | 1.186              | 10.628 | -3.867 | 7.841    | -9.592 | -5.740 | 8.139     | 869.000   | 1     |
| 2015-09-11/09:55-10:05                             | 0.328                                | 9.543                                  | 97.676           | 22,705.922       | 33.864            | 597.728           | 12.118            | 382.099           | 3.356             | 258.424           | 5.403              | 7.128  | -4.424 | -5.303   | 3.485  | -5.553 | 5.864     | 689.364   | 1     |
| 2015-09-14/10:05-10:15                             | 0.049                                | 9.756                                  | 42.821           | 23,447.125       | 9.140             | 320.256           | 3.622             | 173.490           | 1.014             | 100.230           | 5.727              | 7.250  | -4.631 | -2.813   | 7.955  | -5.338 | 3.104     | 542.727   | 0     |
| 2015-09-14/15:27-15:40                             | 0.025                                | 11.241                                 | 37.334           | 26,970.368       | 4.851             | 363.691           | 2.780             | 177.241           | 1.334             | 82.722            | 3.760              | 10.031 | -5.403 | -4.193   | 1.985  | -5.086 | 1.990     | 1,048.786 | 0     |
| 2015-09-18/08:30-08:35                             | 0.045                                | 16.843                                 | 40.623           | 18,853.343       | 9.521             | 264.591           | 4.352             | 164.118           | 0.978             | 99.159            | 6.314              | 6.066  | -3.600 | 0.493    | 3.490  | -5.050 | 3.223     | 602.667   | 0     |
| 2015-09-19/07:43-07:48                             | 0.054                                | 17.642                                 | 62.590           | 43,832.709       | 9.269             | 521.361           | 3.712             | 396.036           | 1.121             | 227.670           | 6.344              | 5.414  | -2.997 | 2.262    | -7.480 | -4.958 | 4.010     | 851.833   | 0     |
| 2015-09-20/06:35-06:45                             | 0.102                                | 14.666                                 | 80.937           | 35,712.553       | 10.240            | 1,163.906         | 7.678             | 602.357           | 2.772             | 325.489           | 6.154              | 4.352  | -2.088 | -9.394   | 6.299  | -4.925 | 7.106     | 752.091   | 0     |
| 2015-09-20/11:55-12:10                             | 0.434                                | 7.442                                  | 80.124           | 16,341.032       | 71.086            | 400.462           | 28.091            | 240.984           | 6.978             | 143.438           | 5.999              | 8.204  | -5.510 | -5.784   | 5.480  | -4.753 | 2.717     | 521.188   | 0     |
| 2015-09-20/13:08-13:15                             | 0.016                                | 10.544                                 | 30.954           | 13,836.314       | 6.678             | 73.363            | 2.834             | 31.369            | 0.886             | 15.220            | 5.589              | 8.763  | -5.685 | -8.054   | 1.125  | -4.638 | 2.098     | 722.750   | 0     |
| 2015-09-20/15:10-15:30                             | 0.096                                | 5.629                                  | 33.507           | 16,883.659       | 15.966            | 248.980           | 13.872            | 116.136           | 4.277             | 81.692            | 4.632              | 9.612  | -5.452 | -6.761   | 2.044  | -4.557 | 1.932     | 904.381   | 0     |
| 2015-09-20/15:50-16:00                             | 0.060                                | 6.365                                  | 31.734           | 13,611.068       | 13.464            | 271.933           | 8.134             | 136.969           | 2.675             | 88.419            | 4.272              | 9.815  | -5.250 | -6.335   | 2.445  | -4.505 | 2.251     | 797.455   | 1     |
| 2015-09-23/09:30-09:40                             | 0.029                                | 9.385                                  | 38.675           | 21,243.013       | 4.903             | 309.771           | 2.772             | 95.593            | 1.145             | 43.088            | 6.868              | 6.745  | -4.430 | 7.346    | -1.930 | -4.083 | 2.180     | 578.000   | 0     |
| 2015-10-03/07:20-07:35                             | 0.085                                | 8.665                                  | 36.580           | 17,494.913       | 13.027            | 347.510           | 4.431             | 224.319           | 1.304             | 114.122           | 7.924              | 5.148  | -3.039 | -6.693   | 6.429  | -4.080 | 1.711     | 530.188   | 0     |
| 2015-10-03/15:30-15:35                             | 0.018                                | 15.300                                 | 42.059           | 29,640.560       | 4.033             | 420.373           | 2.519             | 229.615           | 0.974             | 104.451           | 5.831              | 8.840  | -5.035 | -4.737   | -3.845 | -3.942 | 2.385     | 775.500   | 1     |
| 2015-10-04/09:20-09:30                             | 0.059                                | 3.884                                  | 29.528           | 9,586.658        | 16.949            | 123.538           | 3.718             | 43.133            | 1.314             | 13.713            | 8.147              | 6.287  | -4.297 | -7.468   | 5.159  | -3.925 | 0.994     | 551.818   | 1     |
| 2015-10-08/16:38-16:42                             | 0.035                                | 4.557                                  | 28.378           | 11,347.393       | 6.925             | 813.632           | 6.872             | 146.593           | 3.493             | 54.523            | 5.487              | 8.618  | -4.415 | -0.558   | -0.594 | -3.753 | 2.023     | 697.600   | 0     |

|                        |       |        |        |            |        |         |        |         |       |         |        |        |        |        |         |        |       |           |   |
|------------------------|-------|--------|--------|------------|--------|---------|--------|---------|-------|---------|--------|--------|--------|--------|---------|--------|-------|-----------|---|
| 2015-10-09/15:05-15:10 | 0.019 | 4.821  | 28.371 | 11,498.846 | 4.675  | 214.226 | 1.982  | 112.652 | 0.769 | 103.451 | 6.614  | 8.263  | -4.885 | -4.038 | -2.435  | -3.748 | 2.116 | 953.833   | 1 |
| 2015-10-10/07:10-07:15 | 0.022 | 2.286  | 33.746 | 6,406.791  | 4.691  | 228.993 | 1.733  | 135.324 | 0.981 | 71.948  | 8.680  | 4.768  | -2.840 | -5.092 | 0.693   | -3.577 | 0.923 | 780.667   | 1 |
| 2015-10-14/13:20-13:25 | 0.015 | 4.510  | 27.982 | 9,757.235  | 4.640  | 135.480 | 1.699  | 73.304  | 0.789 | 35.535  | 8.026  | 7.321  | -4.898 | -2.128 | -0.328  | -3.520 | 1.980 | 516.333   | 1 |
| 2015-10-18/15:05-15:10 | 0.197 | 7.830  | 48.944 | 21,293.363 | 32.270 | 322.094 | 14.575 | 181.302 | 2.758 | 71.246  | 7.280  | 7.500  | -4.400 | -3.192 | 1.093   | -3.458 | 1.998 | 615.667   | 1 |
| 2015-11-08/14:20-14:25 | 0.093 | 4.278  | 38.996 | 14,081.292 | 14.963 | 129.709 | 9.067  | 71.091  | 3.005 | 36.468  | 8.552  | 5.343  | -3.136 | -6.512 | 6.132   | -3.220 | 1.213 | 624.167   | 1 |
| 2015-11-16/14:20-14:25 | 0.179 | 10.410 | 69.184 | 38,612.681 | 23.719 | 222.091 | 8.483  | 125.696 | 1.865 | 65.743  | 8.490  | 4.580  | -2.588 | -3.225 | 3.158   | -3.075 | 1.458 | 873.667   | 0 |
| 2016-09-26/13:40-13:45 | 0.035 | 4.052  | 32.605 | 9,870.575  | 5.268  | 165.454 | 1.733  | 111.824 | 0.829 | 56.191  | 3.195  | 7.324  | -5.318 | -4.700 | 4.693   | -2.880 | 3.153 | 517.500   | 0 |
| 2016-09-28/14:47-14:52 | 0.132 | 2.220  | 35.432 | 6,675.883  | 28.059 | 320.423 | 19.565 | 211.106 | 6.172 | 169.569 | 2.981  | 8.561  | -5.387 | -2.267 | 4.780   | -2.842 | 4.364 | 1,304.667 | 0 |
| 2016-09-28/21:15-21:20 | 0.077 | 1.753  | 43.496 | 3,805.188  | 9.287  | 112.467 | 4.182  | 73.255  | 1.516 | 44.468  | -0.244 | 11.499 | -2.821 | -4.660 | 4.937   | -2.667 | 3.760 | 613.667   | 1 |
| 2016-09-29/16:10-16:15 | 0.009 | 2.720  | 38.925 | 6,683.875  | 5.114  | 159.368 | 2.688  | 78.244  | 1.808 | 49.182  | 2.494  | 9.773  | -5.082 | -5.688 | 0.307   | -2.359 | 2.123 | 832.667   | 1 |
| 2016-09-30/18:15-18:20 | 0.007 | 1.568  | 25.038 | 4,772.589  | 4.238  | 162.619 | 1.574  | 78.375  | 0.727 | 35.685  | 1.602  | 11.027 | -4.141 | 0.817  | 4.380   | -2.348 | 2.217 | 1,034.667 | 1 |
| 2016-10-01/19:00-19:05 | 0.008 | 4.288  | 31.446 | 9,139.342  | 3.659  | 111.740 | 1.563  | 73.806  | 0.773 | 53.333  | 1.344  | 11.294 | -3.720 | -4.800 | 3.188   | -2.095 | 1.950 | 818.333   | 1 |
| 2016-10-02/19:45-19:50 | 0.007 | 2.386  | 26.212 | 5,245.227  | 3.428  | 307.222 | 1.602  | 176.983 | 0.862 | 92.688  | 1.076  | 11.445 | -3.302 | -2.505 | 0.973   | -1.883 | 2.417 | 601.000   | 0 |
| 2016-10-02/20:40-20:45 | 0.009 | 0.992  | 27.296 | 2,920.964  | 4.557  | 153.313 | 1.936  | 61.723  | 0.889 | 24.041  | 0.581  | 11.491 | -2.882 | -3.963 | 4.312   | -1.826 | 2.665 | 797.667   | 1 |
| 2016-10-10/19:05-19:10 | 0.019 | 10.806 | 48.495 | 9,451.304  | 2.594  | 265.243 | 1.072  | 148.461 | 0.726 | 49.174  | 2.444  | 11.242 | -3.219 | -1.855 | -5.317  | -1.755 | 4.380 | 515.000   | 0 |
| 2016-10-16/19:15-19:20 | 0.010 | 2.132  | 31.153 | 4,993.229  | 3.109  | 353.942 | 1.365  | 117.251 | 0.841 | 54.955  | 3.088  | 11.085 | -2.730 | 1.180  | -1.388  | -1.723 | 3.363 | 511.000   | 1 |
| 2016-10-24/17:00-17:05 | 0.013 | 10.196 | 35.503 | 14,807.722 | 3.488  | 396.836 | 1.874  | 218.140 | 0.908 | 95.626  | 5.228  | 10.248 | -3.330 | -4.968 | -2.340  | -1.521 | 2.084 | 615.167   | 1 |
| 2016-10-25/19:35-19:40 | 0.110 | 3.711  | 48.360 | 11,192.526 | 14.878 | 286.085 | 7.982  | 129.610 | 2.818 | 85.624  | 3.871  | 10.630 | -1.845 | -7.228 | -2.135  | -1.263 | 4.426 | 533.833   | 1 |
| 2016-10-26/20:30-20:35 | 0.077 | 1.376  | 40.532 | 4,397.794  | 8.588  | 268.889 | 4.054  | 166.867 | 1.901 | 96.013  | 3.352  | 10.428 | -1.329 | -3.675 | 1.825   | -1.085 | 2.458 | 611.667   | 1 |
| 2016-10-27/09:55-10:00 | 0.039 | 1.300  | 29.068 | 4,507.753  | 9.425  | 147.744 | 4.256  | 31.553  | 1.359 | 7.836   | 7.079  | 5.093  | -3.753 | -1.590 | 1.937   | -1.040 | 2.018 | 602.000   | 1 |
| 2016-10-27/13:20-13:25 | 0.007 | 4.775  | 28.087 | 10,389.690 | 3.113  | 184.251 | 1.421  | 62.515  | 0.938 | 26.536  | 6.941  | 8.013  | -4.363 | -4.160 | 1.272   | -0.552 | 1.482 | 857.000   | 1 |
| 2016-10-30/10:38-10:42 | 0.041 | 6.901  | 35.680 | 19,376.901 | 9.000  | 294.194 | 5.035  | 42.561  | 1.908 | 7.614   | 7.540  | 5.815  | -3.895 | 0.767  | 5.597   | -0.323 | 1.958 | 590.200   | 0 |
| 2016-10-30/14:19-14:24 | 0.027 | 2.302  | 27.364 | 6,457.850  | 6.944  | 125.662 | 3.486  | 53.454  | 1.281 | 31.814  | 7.037  | 8.650  | -3.938 | -2.507 | 5.683   | -0.082 | 1.280 | 689.500   | 0 |
| 2016-11-01/14:25-14:30 | 0.026 | 4.780  | 35.876 | 12,501.479 | 8.350  | 89.432  | 4.044  | 43.039  | 1.145 | 25.107  | 7.238  | 8.656  | -3.735 | -5.298 | 3.512   | -0.010 | 1.678 | 825.500   | 0 |
| 2016-11-03/15:00-15:05 | 0.013 | 8.588  | 34.976 | 11,027.917 | 5.616  | 133.266 | 1.749  | 70.526  | 0.731 | 32.264  | 7.255  | 8.917  | -3.352 | -3.302 | 1.390   | 0.455  | 1.705 | 538.833   | 1 |
| 2016-11-10/18:00-18:05 | 0.099 | 10.036 | 42.347 | 17,276.490 | 15.741 | 978.148 | 10.028 | 521.538 | 4.633 | 198.498 | 6.326  | 9.367  | -1.185 | 4.717  | -12.147 | 1.289  | 3.937 | 505.833   | 1 |
| 2016-11-24/18:34-18:39 | 0.146 | 12.607 | 56.746 | 21,853.488 | 18.622 | 210.170 | 6.624  | 131.102 | 1.690 | 65.935  | 6.552  | 7.823  | 0.411  | -4.878 | 8.120   | 1.738  | 4.230 | 980.333   | 1 |
| 2016-12-09/17:55-18:00 | 0.066 | 14.206 | 48.722 | 27,833.406 | 9.397  | 406.408 | 4.492  | 104.636 | 1.806 | 66.431  | 7.119  | 5.964  | 1.317  | 2.483  | -4.498  | 2.095  | 2.928 | 867.000   | 0 |
| 2016-12-11/16:05-16:15 | 0.008 | 8.925  | 31.344 | 15,876.745 | 2.633  | 183.658 | 1.090  | 91.379  | 0.773 | 58.836  | 8.833  | 5.651  | 0.869  | 1.319  | -3.365  | 2.790  | 2.884 | 561.364   | 1 |
| 2016-12-21/16:40-16:45 | 0.040 | 26.924 | 53.825 | 57,299.640 | 4.415  | 516.426 | 2.647  | 122.863 | 1.432 | 47.428  | 7.969  | 4.424  | 1.650  | -8.322 | 6.352   | 3.475  | 5.648 | 1,652.833 | 0 |
| 2016-12-26/15:00-15:05 | 0.013 | 12.586 | 34.978 | 27,348.612 | 3.768  | 476.602 | 1.189  | 67.514  | 0.682 | 15.257  | 9.381  | 3.479  | 1.533  | -4.730 | 0.708   | 4.402  | 2.380 | 793.000   | 0 |
